# Supplementary material
Source: Springer Nature journal article supplement (https://www.springermedizin.de/resource/supplementary/12985_2010_1007_MOESM4_ESM.pdf/9608950)

A

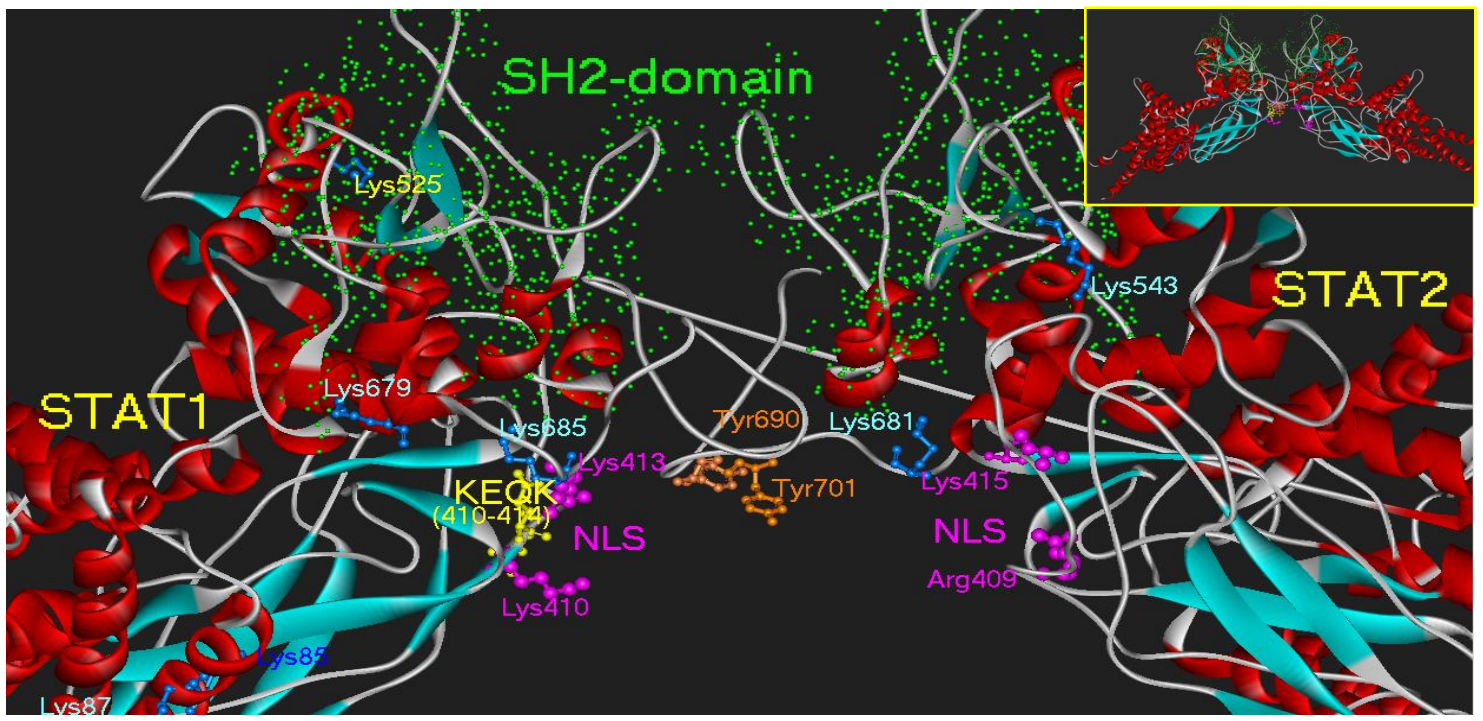

B

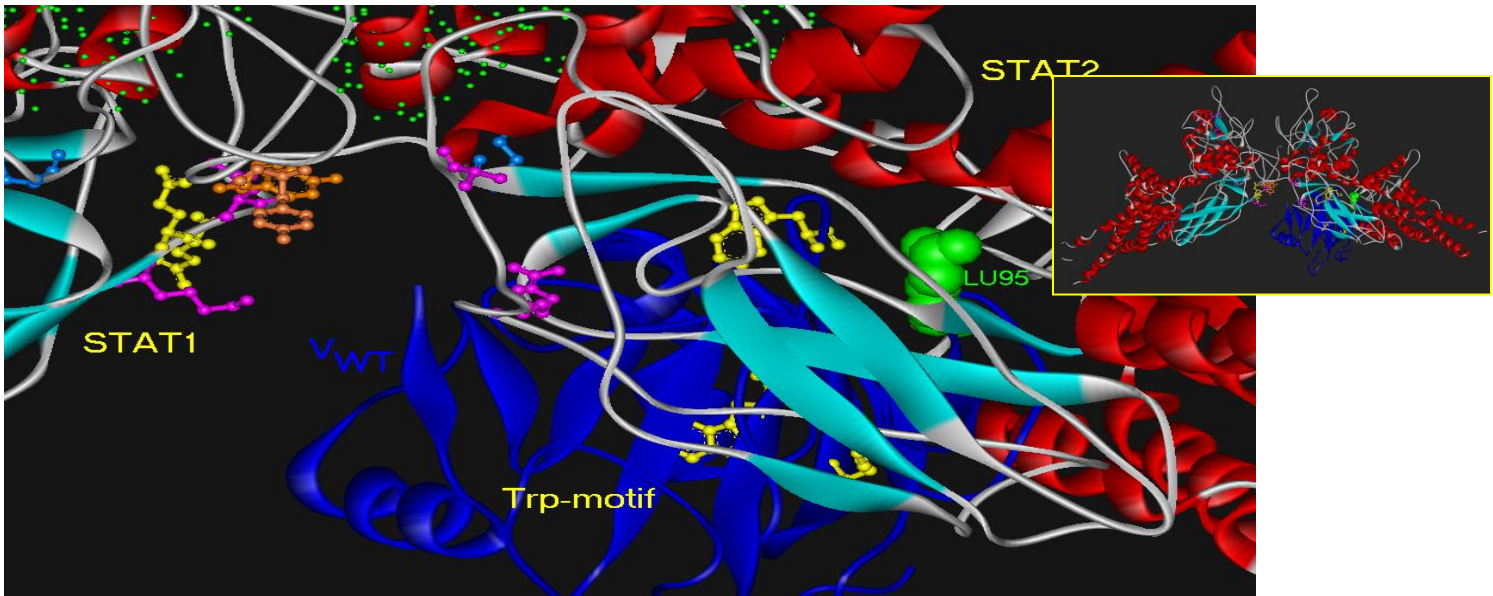

C

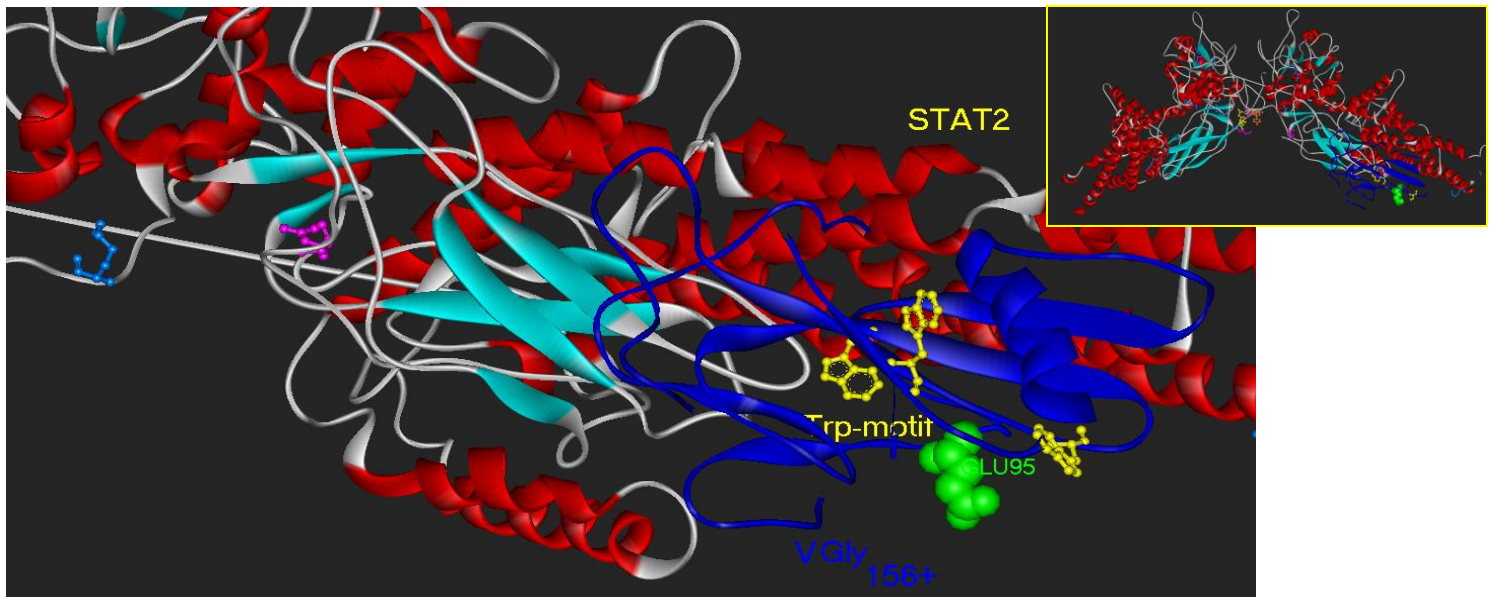

Figure 5

Supplement: MOESM4 [file 9608950]
